# Supplementary material for: Thermomechanical Stress Analysis of Hydrated Vital Gluten with Large Amplitude Oscillatory Shear Rheology
Source: MDPI journal article supplement (doi:10.3390/polym15163442), 2023-08-17
Supplement: s1 [file s1]

## Supplementary material

# Thermomechanical Stress Analysis of Hydrated Vital Gluten with Large Amplitude Oscillatory Shear Rheology

Monika C. Wehrli <sup>1,\*</sup>, Anna Weise <sup>1</sup>, Tim Kratky <sup>2</sup> and Thomas Becker <sup>1</sup>

<sup>1</sup> Research Group Cereal Technology and Process Engineering, Institute of Brewing and Beverage Technology, Technical University of Munich, Weihenstephaner Steig 20, 85354 Freising, Germany

<sup>2</sup> Department of Chemistry, Technical University of Munich, Lichtenbergstraße 4, 85748 Garching, Germany

\* Correspondence: monika.wehrli@tum.de

G' —●— 25°C —●— 45°C —●— 55°C —●— 65°C —●— 70°C —●— 85°C  
G'' —■— 25°C —■— 45°C —■— 55°C —■— 65°C —■— 70°C —■— 85°C

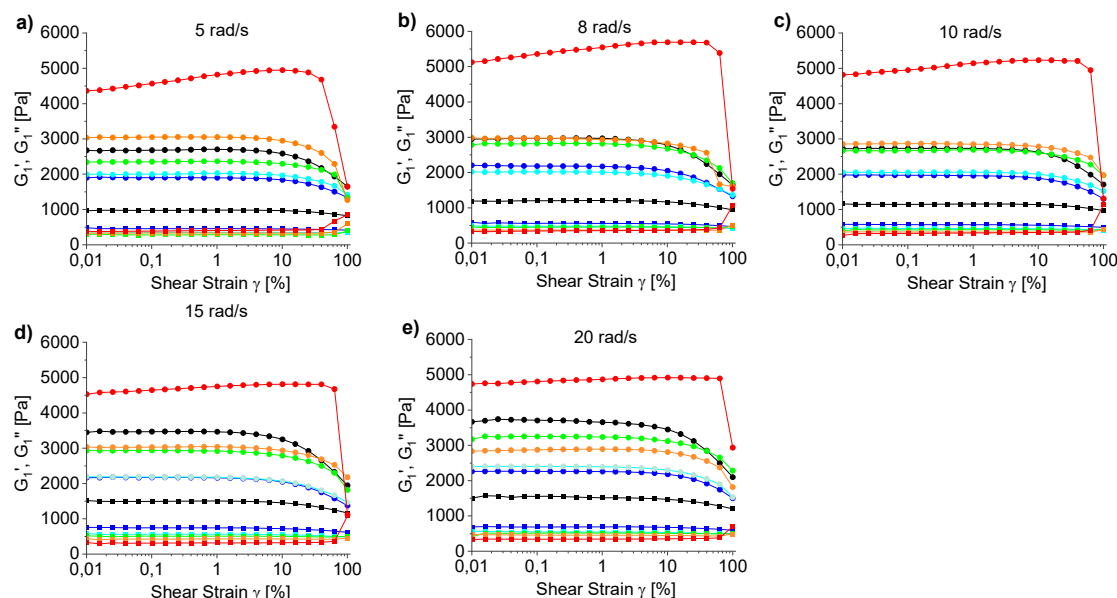

Figure S1: Fundamental rheological response of vital gluten measured at angular frequencies of 5 – 20 rad/s (a – e) and at temperatures of 25 – 85 °C (color coded).

Table S1. Critical shear strain for each conducted temperature.

| T [°C]                             | 25          | 45          | 55          | 65          | 70          | 85                                         |
|------------------------------------|-------------|-------------|-------------|-------------|-------------|--------------------------------------------|
| $\sigma_{LVE \text{ left}}$<br>[%] | 10.1 – 15,9 | 10.1 – 15,9 | 15.9 – 25.2 | 15.9 – 25.2 | 15.9 – 25.2 | No clear LVE<br>plateau for<br>calculation |

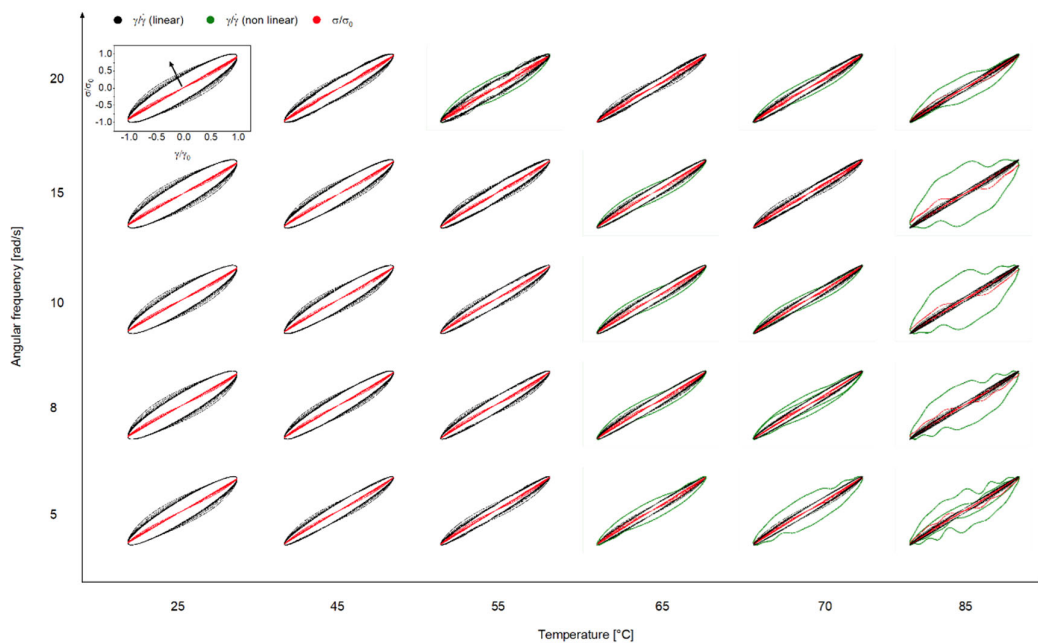

**Figure S2:** Normalized elastic Lissajous-Bowditch curves of hydrated gluten for all measured temperatures and angular frequencies.

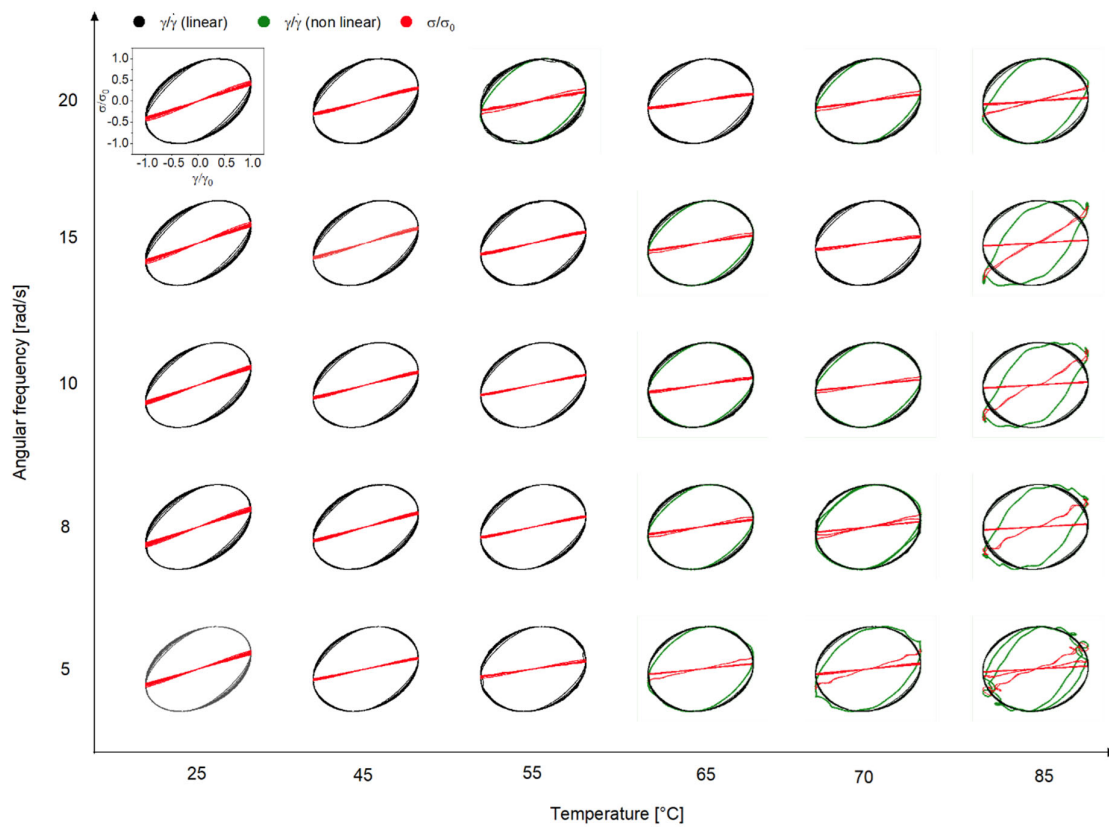

**Figure S3:** Normalized viscous Lissajous-Bowditch curves of hydrated gluten for all measured temperatures and angular frequencies.

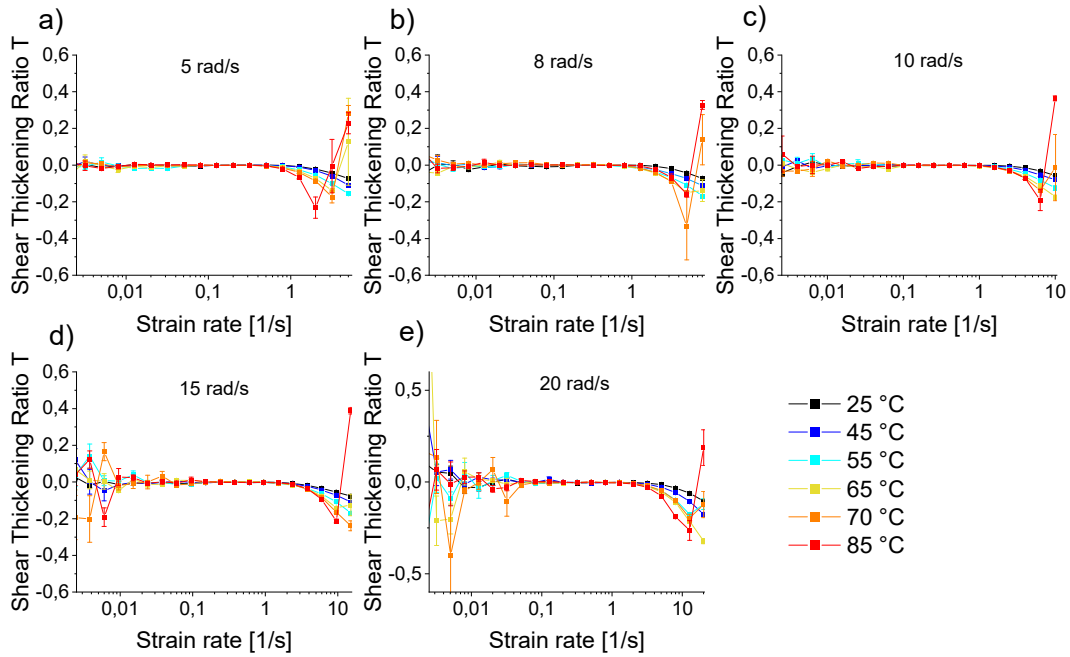

Figure S4: Shear thickening ratio  $T$  of hydrated gluten measured at various temperatures (color coded) and angular frequencies of 5 – 20 rad/s (a – e).

$T$  is temperature- and frequency- dependent: With higher measuring temperature, the values of  $T$  are lower and the material becomes shear thinning above a strain rate of 1/s (for 5 rad/s) to 3/s (for 20 rad/s).

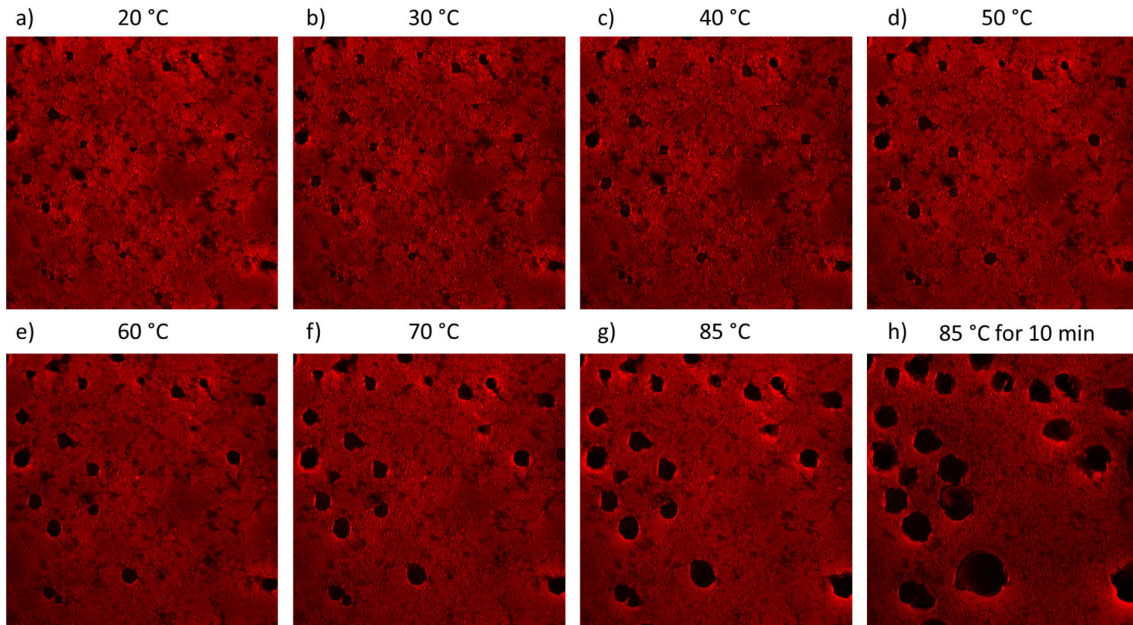

Figure S5: CLSM images of hydrated gluten at measuring temperatures of 20 – 85 °C (a – h).
